# Supplementary material for: Volatile Terpenes and Brain Function: Investigation of the Cognitive and Mood Effects of Mentha × Piperita L. Essential Oil with In Vitro Properties Relevant to Central Nervous System Function
Source: PubMed Central journal article supplement (PMC6116079; doi:10.3390/nu10081029), 2018-08-07
Supplement: nutrients-10-01029-s001.pdf [file nutrients-10-01029-s001.pdf]

**Volatile terpenes and brain function: Investigation of the cognitive and mood effects of *Mentha × piperita* L. essential oil with in vitro properties relevant to central nervous system function**

**Supplementary Tables:**

**Table S1.** Percentage composition of compounds detected in the *Mentha spicata* and *Mentha × piperita* essential oils, obtained from the GC-MS total ion chromatograms.

| Compound                       | Retention time (min) | <i>M. spicata</i> Oil 1 (%) | <i>M. spicata</i> Oil 2 (%) | <i>M. spicata</i> Oil 3 (%) | <i>M. piperita</i> Oil 4 (%) | <i>M. piperita</i> Oil 5 (%) | <i>M. piperita</i> Oil 6 (%) | RI*  | RI [39] |
|--------------------------------|----------------------|-----------------------------|-----------------------------|-----------------------------|------------------------------|------------------------------|------------------------------|------|---------|
| $\alpha$ -Thujene              | 11.4                 | 0.08                        | 0.01                        | 0.06                        | 0.02                         | 0.04                         | 0.02                         | 900  | 924     |
| $\alpha$ -Pinene               | 11.7                 | 1.90                        | 0.47                        | 0.84                        | 0.70                         | 0.70                         | 0.42                         | 908  | 932     |
| Camphene                       | 12.5                 | 0.29                        | 0.03                        | 0.03                        | 0.01                         | 0.05                         | 0.05                         | 924  | 946     |
| Sabinene                       | 13.6                 | 0.96                        | 0.12                        | 0.60                        | 0.27                         | 0.47                         | 0.32                         | 948  | 969     |
| $\beta$ -Pinene                | 13.8                 | 2.39                        | 0.85                        | 0.93                        | 0.69                         | 1.06                         | 0.71                         | 953  | 974     |
| 1-Octen-3-ol                   | 13.9                 | Nd                          | Nd                          | Nd                          | 0.02                         | 0.06                         | 0.05                         | 957  | 974     |
| 3-Octanone                     | 14.1                 | 0.08                        | 0.01                        | 0.02                        | 0.03                         | 0.07                         | 0.04                         | 961  | 979     |
| Myrcene                        | 14.3                 | 0.67                        | 0.27                        | 1.64                        | 0.06                         | 0.11                         | 0.12                         | 961  | 988     |
| 3-Octanol                      | 14.8                 | 1.06                        | 0.29                        | 0.39                        | 0.09                         | 0.18                         | 0.17                         | 974  | 988     |
| <i>p</i> -Mentha-1(7),8-diene  | 15.0                 | 0.15                        | 0.03                        | 0.12                        | 0.01                         | 0.03                         | 0.02                         | 980  | 1003    |
| $\alpha$ -Phellandrene         | 15.1                 | Nd                          | Nd                          | Nd                          | 0.01                         | 0.01                         | 0.02                         | 983  | 1002    |
| 3- $\delta$ -Carene            | 15.4                 | 0.07                        | 0.02                        | Nd                          | 0.01                         | 0.01                         | 0.01                         | 990  | 1008    |
| 1,4-Cineole                    | 15.6                 | 0.01                        | 0.01                        | Nd                          | Tr                           | Tr                           | Nd                           | 993  | 1012    |
| <i>o</i> -Cymene               | 16.0                 | 0.61                        | 0.79                        | 0.42                        | 0.25                         | 0.92                         | 0.54                         | 1003 | 1022    |
| Limonene                       | 16.3                 | 20.81                       | 20.81                       | 18.38                       | 2.34                         | 2.37                         | 2.06                         | 1010 | 1024    |
| 1,8-Cineole                    | 16.4                 | 1.01                        | 0.81                        | 2.06                        | 5.80                         | 5.59                         | 5.34                         | 1012 | 1026    |
| ( <i>Z</i> )- $\beta$ -Ocimene | 16.6                 | Nd                          | Nd                          | 0.13                        | 0.12                         | 0.10                         | 0.16                         | 1015 | 1032    |
| ( <i>E</i> )- $\beta$ -Ocimene | 17.1                 | 0.08                        | 0.05                        | 0.06                        | 0.02                         | 0.02                         | 0.04                         | 1026 | 1044    |
| $\gamma$ -Terpinene            | 17.6                 | 0.10                        | 0.09                        | 0.32                        | 0.14                         | 0.08                         | 0.22                         | 1039 | 1054    |
| <i>cis</i> -Sabinene hydrate   | 18.3                 | 0.17                        | 0.07                        | 0.50                        | 0.23                         | 0.44                         | 0.57                         | 1054 | 1065    |

|                                      |      |      |      |      |       |       |       |      |      |
|--------------------------------------|------|------|------|------|-------|-------|-------|------|------|
| Terpinolene                          | 19.0 | 0.09 | 0.04 | 0.11 | 0.06  | 0.04  | 0.08  | 1068 | 1086 |
| <i>p</i> -Cymenene                   | 19.2 | 0.05 | 0.03 | 0.05 | 0.01  | 0.01  | 0.02  | 1074 | 1089 |
| Linalool                             | 19.8 | 0.06 | 0.02 | 0.07 | 0.01  | 0.20  | 0.47  | 1086 | 1095 |
| <i>trans</i> -Sabinene hydrate       | 19.9 | 0.01 | 0.01 | 0.07 | 0.07  | 0.13  | Tr    | 1088 | 1098 |
| 3-Octanol acetate                    | 20.7 | 0.01 | 0.02 | 0.12 | 0.02  | 0.04  | 0.04  | 1105 | 1120 |
| <i>trans-p</i> -Mentha-2,8-dien-1-ol | 20.8 | 0.01 | 0.01 | 0.04 | 0.01  | 0.02  | 0.01  | 1110 | 1119 |
| <i>cis</i> -Limonene oxide           | 21.3 | 0.05 | 0.03 | 0.03 | Tr    | 0.01  | 0.01  | 1121 | 1132 |
| <i>cis-p</i> -Mentha-2,8-dien-1-ol   | 21.6 | 0.04 | 0.03 | 0.09 | Tr    | 0.01  | 0.01  | 1126 | 1133 |
| <i>trans</i> -Pinocarveol            | 21.8 | Tr   | 0.01 | 0.04 | Nd    | Nd    | Nd    | 1130 | 1135 |
| <i>trans</i> -Sabinol                | 21.8 | Nd   | Nd   | Nd   | 0.03  | 0.06  | 0.05  | 1131 | 1137 |
| <i>trans</i> -Verbenol               | 22.0 | 0.02 | Nd   | 0.03 | Nd    | Nd    | Nd    | 1136 | 1140 |
| Camphor                              | 22.0 | Tr   | Tr   | Nd   | Tr    | Nd    | 0.03  | 1137 | 1141 |
| Isopulegol                           | 22.2 | 0.01 | 0.21 | 0.01 | 0.12  | 0.12  | 0.13  | 1140 | 1145 |
| Menthone                             | 22.5 | 0.36 | 1.74 | 0.14 | 24.85 | 24.72 | 24.18 | 1146 | 1148 |
| Iso-isopulegol                       | 22.8 | Tr   | 0.01 | Nd   | Nd    | Nd    | Nd    | 1152 | 1155 |
| Menthofuran                          | 22.9 | Nd   | Nd   | Nd   | 2.91  | 2.19  | 3.41  | 1155 | 1159 |
| Isomenthone                          | 23.0 | 0.21 | 0.71 | 0.10 | 5.38  | 4.66  | 4.28  | 1156 | 1158 |
| Neomenthol                           | 23.2 | 0.05 | 0.39 | 0.16 | 3.39  | 3.64  | 3.95  | 1162 | 1161 |
| Borneol                              | 23.3 | 0.02 | Nd   | Tr   | Nd    | Nd    | Nd    | 1165 | 1165 |
| Menthol                              | 23.6 | 0.47 | 2.79 | 0.80 | 36.69 | 32.49 | 34.71 | 1171 | 1167 |
| Terpinen-4-ol                        | 23.8 | 0.10 | Tr   | 1.19 | Nd    | Nd    | Nd    | 1173 | 1174 |
| Isomenthol                           | 24.1 | Nd   | 0.10 | Nd   | 0.51  | 0.74  | 0.79  | 1182 | 1179 |
| Neoisomenthol                        | 24.3 | Nd   | Nd   | Nd   | 0.25  | 0.23  | 0.29  | 1187 | 1184 |
| $\alpha$ -Terpineol                  | 24.4 | Nd   | Nd   | Nd   | 0.48  | 0.62  | 0.53  | 1189 | 1186 |
| <i>cis</i> -Dihydro carvone          | 24.5 | 0.75 | 1.65 | 2.40 | Nd    | Nd    | Nd    | 1191 | 1191 |

|                                                             |      |       |       |       |      |      |      |      |      |
|-------------------------------------------------------------|------|-------|-------|-------|------|------|------|------|------|
| Dihydro carveol                                             | 24.7 | 0.56  | 1.54  | Tr    | Nd   | Nd   | Nd   | 1195 | 1192 |
| <i>trans</i> -Dihydro carvone                               | 24.8 | 0.24  | 0.42  | 0.38  | Nd   | Nd   | Nd   | 1198 | 1200 |
| <i>trans</i> -Carveol                                       | 25.7 | 0.10  | 0.47  | 0.52  | Nd   | Nd   | Nd   | 1218 | 1215 |
| Citronellol                                                 | 26.1 | Nd    | Nd    | Nd    | 0.04 | 0.04 | 0.03 | 1226 | 1223 |
| <i>cis</i> -Carveol                                         | 26.4 | 0.08  | 0.58  | 0.24  | Nd   | Nd   | Nd   | 1235 | 1226 |
| Pulegone                                                    | 26.5 | Nd    | Nd    | Nd    | 1.42 | 1.47 | 1.63 | 1235 | 1233 |
| Carvone                                                     | 27.0 | 61.87 | 57.52 | 58.79 | 0.11 | 0.10 | 0.13 | 1240 | 1239 |
| Piperitone                                                  | 27.3 | 0.13  | 0.42  | 0.62  | 0.36 | 0.59 | 0.74 | 1253 | 1249 |
| <i>cis</i> -Carvone oxide                                   | 27.6 | 0.12  | 0.10  | 0.21  | Nd   | Nd   | Nd   | 1260 | 1259 |
| Neomenthyl acetate                                          | 28.0 | Nd    | Nd    | Nd    | 0.27 | 0.51 | 0.42 | 1268 | 1271 |
| <i>trans</i> -Carvone oxide                                 | 28.2 | Nd    | Nd    | 0.18  | Nd   | Nd   | Nd   | 1273 | 1273 |
| Menthyl acetate                                             | 28.8 | 0.17  | 0.37  | 0.11  | 6.69 | 7.02 | 6.64 | 1287 | 1294 |
| Isomenthyl acetate                                          | 29.5 | Nd    | Nd    | Nd    | 0.17 | 0.37 | 0.27 | 1302 | 1304 |
| Dihydro carveol acetate                                     | 29.5 | 0.04  | 0.43  | 0.03  | Nd   | Nd   | Nd   | 1302 | 1306 |
| Iso-dihydro carveol acetate                                 | 30.3 | 0.46  | 1.61  | 0.27  | Nd   | Nd   | Nd   | 1320 | 1326 |
| $\delta$ -Elemene                                           | 30.7 | Nd    | Nd    | Nd    | 0.05 | 0.02 | 0.03 | 1328 | 1335 |
| $\alpha$ -Cubebene                                          | 31.3 | Nd    | Nd    | Nd    | 0.02 | Tr   | Tr   | 1343 | 1345 |
| 4 $\alpha$ ,7 $\alpha$ ,7 $\alpha\alpha$ -<br>Nepetalactone | 31.5 | Nd    | Nd    | Nd    | 0.06 | 0.32 | 0.17 | 1346 | 1357 |
| Neoiso-dihydro carveol<br>acetate                           | 31.6 | Nd    | 0.20  | Nd    | Nd   | Nd   | Nd   | 1349 | 1356 |
| <i>cis</i> -Carvyl acetate                                  | 31.9 | 0.05  | 0.09  | 0.16  | Nd   | Nd   | Nd   | 1355 | 1365 |
| $\alpha$ -Ylangene                                          | 32.3 | Nd    | Nd    | Nd    | 0.02 | 0.02 | 0.02 | 1365 | 1373 |
| $\alpha$ -Copaene                                           | 32.6 | Nd    | Nd    | Nd    | 0.05 | 0.06 | 0.09 | 1371 | 1374 |
| $\beta$ -Bourbonene                                         | 33.0 | 0.17  | 0.17  | 1.39  | 0.12 | 0.21 | 0.27 | 1379 | 1387 |
| $\beta$ -Elemene                                            | 33.2 | 0.07  | 0.09  | 0.14  | 0.07 | 0.13 | 0.11 | 1385 | 1389 |

|                             |      |      |      |      |      |      |      |      |      |
|-----------------------------|------|------|------|------|------|------|------|------|------|
| (Z)-Caryophyllene           | 33.9 | 0.02 | 0.02 | 0.04 | 0.03 | 0.07 | 0.04 | 1399 | 1408 |
| (E)-Caryophyllene           | 34.5 | 0.23 | 0.82 | 0.90 | 1.80 | 1.71 | 1.91 | 1414 | 1417 |
| $\beta$ -Copaene            | 35.0 | 0.03 | 0.04 | 0.30 | 0.05 | 0.07 | 0.09 | 1423 | 1430 |
| $\alpha$ -trans-Bergamotene | 35.2 | Nd   | Nd   | Nd   | Nd   | 0.03 | 0.01 | 1425 | 1432 |
| (Z)- $\beta$ -Farnesene     | 35.9 | Nd   | Nd   | 0.14 | 0.05 | 0.12 | 0.12 | 1444 | 1440 |
| $\alpha$ -Humulene          | 36.1 | 0.01 | 0.08 | 0.13 | 0.11 | 0.11 | 0.10 | 1447 | 1452 |
| Allo-aromadendrene          | 36.2 | Nd   | Nd   | Nd   | 0.05 | 0.05 | 0.04 | 1451 | 1458 |
| cis-Muurolo-4(14),5-diene   | 36.6 | 0.01 | 0.03 | 0.09 | 0.02 | 0.02 | 0.02 | 1459 | 1465 |
| $\gamma$ -Muuroloene        | 36.8 | Nd   | Nd   | Nd   | 0.03 | 0.06 | 0.03 | 1465 | 1478 |
| Germacrene D                | 37.1 | Tr   | 0.03 | 0.32 | 0.36 | 0.02 | 0.28 | 1471 | 1484 |
| Viridiflorene               | 37.5 | Nd   | Nd   | Nd   | 0.03 | 0.05 | 0.03 | 1480 | 1496 |
| Mint furanone <sup>a</sup>  | 37.8 | Nd   | Nd   | Nd   | Nd   | 0.33 | Nd   | 1487 | -    |
| $\alpha$ -Muuroloene        | 37.9 | 0.01 | 0.02 | 0.03 | Nd   | Nd   | Nd   | 1488 | 1500 |
| $\gamma$ -Cadinene          | 38.5 | Nd   | Nd   | Nd   | 0.02 | 0.04 | 0.02 | 1500 | 1513 |
| $\delta$ -Cadinene          | 38.6 | Tr   | 0.02 | 0.02 | 0.04 | 0.08 | 0.04 | 1504 | 1522 |
| Spathulenol                 | 41.0 | Nd   | Nd   | Nd   | 0.01 | 0.11 | 0.03 | 1558 | 1577 |
| Caryophyllene oxide         | 41.3 | 0.04 | 0.10 | 0.04 | 0.10 | 0.68 | 0.20 | 1563 | 1582 |
| Viridiflorol                | 41.7 | Nd   | Nd   | Nd   | 0.04 | 0.16 | 0.04 | 1574 | 1592 |

All compounds identified by comparing retention indices [RI] (calculated against an *n*-alkane series) and by comparing mass spectra with published data [39,40], except for <sup>a</sup>compounds identified by comparison with published mass spectra only [40]. <sup>\*</sup>Experimental RI value. Nd: Not detected / below level of detection. Tr: < 0.01%.

**Table S2..** Individual cognitive task performance: pre-dose baseline (raw) data and ‘% change from baseline’ data for the 1 hr, 3 hr and 6 hr assessments. Immediate and Delayed Word Recall correct and error post-dose scores are ‘change from baseline’ (due to potential zero scores). Scores are mean (+ SEM).

| TASK                                      | Treatment | ASSESSMENT |        |       |      |       |       |        |       |
|-------------------------------------------|-----------|------------|--------|-------|------|-------|-------|--------|-------|
|                                           |           | Baseline   | 1 hr   | 3 hr  | 6 hr |       |       |        |       |
| Corsi Blocks<br>(span score)              | 100 µL    | 6.35       | 0.17   | -0.20 | 2.57 | 1.18  | 2.68  | -3.03  | 2.06  |
|                                           | 50 µL     | 6.30       | 0.14   | -0.73 | 3.37 | -0.32 | 2.77  | -6.64  | 2.63  |
|                                           | placebo   | 6.23       | 0.20   | 3.39  | 2.84 | 0.46  | 3.34  | 1.63   | 2.62  |
| Choice Reaction Time (% correct)          | 100 µL    | 97.83      | 0.52   | -0.83 | 0.77 | -0.15 | 0.49  | -0.60  | 0.58  |
|                                           | 50 µL     | 96.87      | 0.87   | 0.20  | 0.74 | 0.02  | 0.77  | 0.36   | 0.62  |
|                                           | placebo   | 97.65      | 0.73   | -0.70 | 0.40 | -0.98 | 0.62  | -0.86  | 0.65  |
| Choice Reaction Time (speed - msecs)      | 100 µL    | 411.83     | 12.69  | 4.10  | 2.58 | 4.20  | 3.20  | 1.56   | 2.14  |
|                                           | 50 µL     | 421.84     | 14.57  | 5.36  | 3.57 | 2.96  | 2.93  | -0.56  | 1.81  |
|                                           | placebo   | 412.24     | 10.73  | 1.37  | 1.46 | 2.21  | 1.65  | -1.33  | 1.53  |
| Name-to-Faces<br>(% correct)              | 100 µL    | 54.17      | 4.36   | -9.67 | 7.23 | 8.86  | 16.01 | 0.28   | 11.05 |
|                                           | 50 µL     | 61.55      | 3.56   | -17.9 | 4.96 | -22.4 | 6.19  | -14.89 | 5.41  |
|                                           | placebo   | 57.95      | 3.58   | -8.59 | 9.69 | -9.72 | 8.01  | -17.46 | 6.25  |
| Numeric Working Memory<br>(% correct)     | 100 µL    | 94.44      | 0.90   | 0.74  | 0.82 | 0.49  | 0.90  | -0.70  | 0.94  |
|                                           | 50 µL     | 94.49      | 0.84   | 0.08  | 0.73 | -0.11 | 0.83  | -0.61  | 1.00  |
|                                           | placebo   | 94.93      | 0.77   | -0.36 | 1.03 | -0.64 | 1.01  | -1.75  | 0.89  |
| Numeric Working Memory<br>(speed - msecs) | 100 µL    | 722.14     | 40.28  | -1.00 | 2.29 | -0.70 | 2.41  | -1.13  | 2.23  |
|                                           | 50 µL     | 693.32     | 33.54  | 2.03  | 2.48 | -0.71 | 2.74  | -1.25  | 2.01  |
|                                           | placebo   | 684.89     | 27.22  | 1.15  | 1.99 | -2.16 | 1.90  | 1.14   | 3.06  |
| Peg and Ball (completion time – msecs)    | 100 µL    | 6592.0     | 471.09 | -3.57 | 2.81 | -8.20 | 1.97  | -6.06  | 2.27  |
|                                           | 50 µL     | 6623.4     | 354.29 | -2.71 | 2.54 | -9.68 | 3.06  | -10.32 | 2.43  |
|                                           | placebo   | 6685.5     | 371.52 | -5.28 | 2.17 | -11.3 | 1.89  | -9.37  | 2.45  |
| Peg and Ball (thinking time – msecs)      | 100 µL    | 1804.2     | 153.23 | -4.65 | 5.98 | -8.68 | 5.20  | -11.53 | 5.04  |
|                                           | 50 µL     | 1919.7     | 182.45 | -8.68 | 5.35 | -9.89 | 6.56  | -14.20 | 5.18  |
|                                           | placebo   | 1773.0     | 127.22 | -5.90 | 5.64 | -12.7 | 4.60  | -11.86 | 5.00  |
| Picture Recognition (% correct)           | 100 µL    | 89.42      | 2.38   | -2.39 | 2.67 | -7.59 | 2.08  | -8.59  | 2.67  |
|                                           | 50 µL     | 89.86      | 1.99   | -7.76 | 2.60 | -7.75 | 1.94  | -6.77  | 2.34  |
|                                           | placebo   | 85.65      | 2.24   | 2.28  | 1.91 | -1.61 | 2.59  | -5.99  | 3.25  |
| Picture Recognition (speed - msecs)       | 100 µL    | 759.46     | 24.46  | 2.33  | 2.06 | 3.92  | 1.96  | 5.76   | 3.91  |
|                                           | 50 µL     | 785.90     | 34.59  | -1.85 | 2.36 | -1.71 | 3.98  | -0.79  | 2.92  |
|                                           | placebo   | 777.22     | 44.22  | -2.54 | 2.27 | -1.52 | 2.56  | -2.57  | 2.80  |
| RVIP<br>(% correct)                       | 100 µL    | 60.34      | 4.12   | -3.67 | 5.33 | -8.67 | 4.47  | -14.55 | 4.96  |
|                                           | 50 µL     | 61.36      | 3.86   | -5.78 | 5.17 | -10.6 | 4.30  | -10.66 | 4.97  |
|                                           | placebo   | 60.00      | 3.47   | -5.22 | 5.24 | -14.1 | 4.09  | -11.85 | 3.41  |
| RVIP<br>(speed - msecs)                   | 100 µL    | 459.13     | 9.52   | -1.02 | 1.22 | -0.25 | 1.60  | 0.58   | 1.69  |
|                                           | 50 µL     | 472.24     | 13.23  | -0.18 | 1.51 | -1.99 | 1.53  | -2.72  | 1.19  |
|                                           | placebo   | 476.75     | 13.51  | -1.37 | 1.09 | -3.43 | 1.46  | -4.20  | 1.54  |
| Word Recognition<br>(% correct)           | 100 µL    | 77.10      | 2.44   | -4.28 | 3.45 | -1.79 | 3.51  | -5.43  | 3.41  |
|                                           | 50 µL     | 75.36      | 2.73   | -0.85 | 3.55 | -1.25 | 3.98  | 1.63   | 4.48  |
|                                           | placebo   | 79.42      | 1.66   | -8.33 | 2.69 | -9.45 | 2.48  | -11.38 | 3.18  |
| Word Recognition (speed – msecs)          | 100 µL    | 770.09     | 33.58  | 7.41  | 3.27 | 0.07  | 2.68  | 1.83   | 2.93  |
|                                           | 50 µL     | 743.33     | 29.70  | 4.38  | 3.18 | 2.37  | 3.48  | 1.48   | 2.34  |
|                                           | placebo   | 770.27     | 32.12  | -1.57 | 2.52 | -4.60 | 3.15  | -1.89  | 3.65  |
| Immediate Word Recall<br>(number)         | 100 µL    | 7.61       | 0.44   | 0.30  | 0.28 | -0.09 | 0.23  | 0.04   | 0.23  |
|                                           | 50 µL     | 7.70       | 0.49   | 0.30  | 0.28 | 0.00  | 0.23  | 0.09   | 0.23  |
|                                           | placebo   | 7.61       | 0.44   | -0.09 | 0.15 | -0.04 | 0.18  | 0.04   | 0.21  |
| Delayed Word Recall (number)              | 100 µL    | 5.07       | 0.53   | -2.04 | 0.46 | -1.91 | 0.49  | -2.74  | 0.69  |
|                                           | 50 µL     | 5.34       | 0.68   | -1.78 | 0.65 | -2.17 | 0.53  | -2.22  | 0.43  |
|                                           | placebo   | 5.20       | 0.58   | -1.37 | 0.42 | -2.59 | 0.47  | -3.13  | 0.64  |

**Table S3.** Mood data: pre-dose baseline (raw) data and ‘% change from baseline’ data for the 1 hr, 3 hr and 6 hr assessments. Scores are mean (+ SEM).

| TASK              | Treatment | ASSESSMENT |      |       |      |       |      |       |      |
|-------------------|-----------|------------|------|-------|------|-------|------|-------|------|
|                   |           | Baseline   |      | 1 hr  |      | 3 hr  |      | 6 hr  |      |
| State-Trait       | 100 µL    | 32.96      | 1.55 | 0.39  | 0.69 | 0.87  | 0.72 | 0.57  | 0.99 |
| Anxiety inventory | 50 µL     | 33.39      | 1.71 | 1.43  | 0.70 | 0.78  | 0.63 | 0.83  | 0.66 |
| (State)           | placebo   | 33.04      | 1.72 | 1.13  | 0.40 | 1.78  | 0.59 | 0.83  | 0.91 |
| Bond-Lader VAS    | 100 µL    | 61.99      | 2.62 | 2.30  | 4.53 | -0.20 | 4.63 | -5.33 | 4.82 |
| Alert             | 50 µL     | 61.68      | 3.26 | 1.77  | 5.28 | -2.73 | 6.59 | -7.33 | 6.10 |
| (% along lines)   | placebo   | 61.61      | 3.30 | 0.77  | 3.11 | -2.48 | 3.22 | -0.42 | 4.22 |
| Bond-Lader VAS    | 100 µL    | 67.93      | 2.58 | 1.90  | 2.16 | -0.91 | 2.30 | -0.71 | 2.00 |
| Content           | 50 µL     | 64.42      | 2.85 | 2.27  | 1.87 | -2.43 | 2.49 | -2.20 | 2.77 |
| (% along lines)   | placebo   | 67.55      | 2.29 | -3.19 | 2.27 | -4.93 | 2.44 | -5.68 | 4.07 |
| Bond-Lader VAS    | 100 µL    | 65.67      | 2.87 | 3.39  | 4.62 | -4.52 | 3.55 | -6.02 | 4.79 |
| Calm              | 50 µL     | 63.20      | 2.58 | -6.41 | 4.15 | -2.62 | 4.23 | -13.0 | 4.22 |
| (% along lines)   | placebo   | 63.81      | 2.51 | -1.16 | 5.99 | -1.89 | 4.67 | -2.06 | 6.71 |

## Appendix I. Neuroprotective properties – Method and results

### CAD cell culture

CAD (Cath.-a-differentiated) cultures were grown at 37°C and in 5% CO<sub>2</sub> on 75 cm<sup>2</sup> tissue culture flasks (Sarstedt, Newton, NC) in Dulbecco's modified Eagles' medium DMEMF-12 Media - GlutaMAX™-I (GIBCO, Grand Island, NY), supplemented with 10% foetal bovine serum (FBS; Sigma, St. Louis, MO, USA). Cells were passaged every 6–7 days at a 1:4 dilution.

Survival of CAD cells was assessed using an MTT assay after 1 h pre-treatment with *M piperita* (0.1 mg/ml (w/v)) followed by 24 h post-treatment with 250 µM H<sub>2</sub>O<sub>2</sub>. All the treatments was performed using n = 6 replicates. The tetrazolium dye MTT (Sigma, UK) was used to assess cell viability as described by Abuhamdah *et al.*, (2015). 50µl Phosphate buffered saline (PBS) (PBS) (136.9 mm 2.68 mm KCl, 4.3 mm Na<sub>2</sub>HPO<sub>4</sub>, 1.4 mm KH<sub>2</sub>PO<sub>4</sub>, pH 7.4) containing a final concentration of 5 mg/ml MTT was added to the cultures and incubated at 37°C and in 5% CO<sub>2</sub> for 2.5 h. The MTT containing medium was then removed and, the surface of the wells was rinsed gently with 300 µl PBS before the application of 250 µL isopropanol. The optical density of 100 µL samples was spectrophotometrically read at 595 nm. (Thermo Lab systems Multiskan Ascent, V1.3).

*M piperita* essential oil (Sample 4) was not neurotoxic up to 0.1mg/ml (not shown). Using this concentration, a modest but significant degree of neuroprotection was observed Vs 250 µM H<sub>2</sub>O<sub>2</sub>. (Figure 1), consistent with previous work.

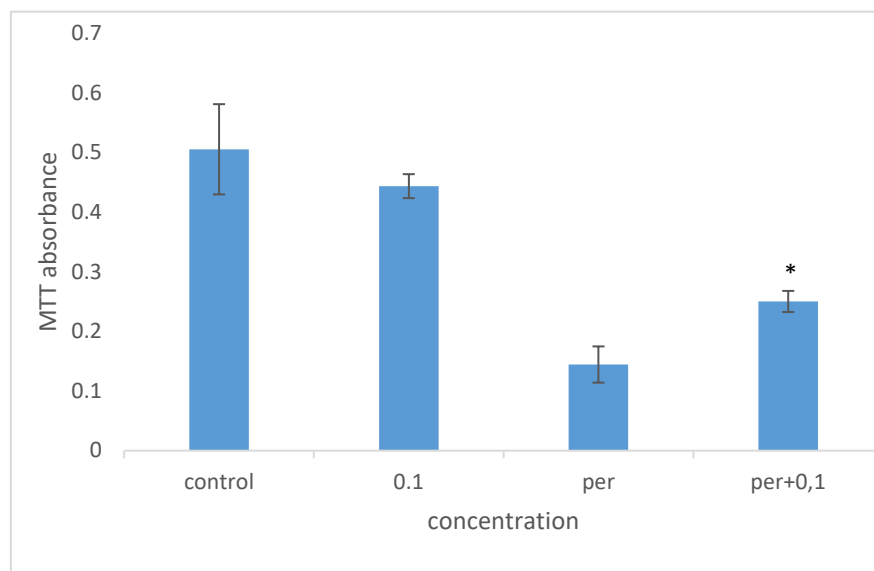

**Figure 4. Neuroprotective effects of *M. Piperita* essential oil.** Cell viability (MTT absorbance) was assayed following exposure to HBS (control), 1mg/ml *M .piperita* essential oil alone, 250 µM hydrogen peroxide or 1mg/ml *M .piperita* essential oil plus 250 µM hydrogen peroxide for 24 hours. 250 µM hydrogen peroxide elicited a robust reduction in viability (75%). Partial protection of CAD neuronal cells was observed with *M .piperita* essential oil (0.1 mg/ml). \* p < 0.05 Vs hydrogen peroxide alone. Representative data (6 replicate samples) from n = 3 individual experiments.
